# Supplementary material for: Targeting Mitochondrial ROS Production to Reverse the Epithelial-Mesenchymal Transition in Breast Cancer Cells
Source: MDPI journal article supplement (doi:10.3390/cimb44110359), 2022-10-29
Supplement: s1 [file s1]

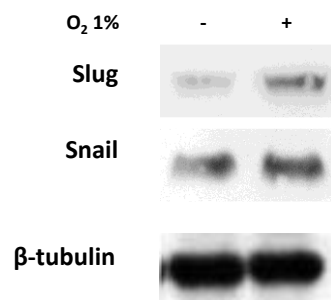

Figure S1 – Slug and Snail protein levels in MDA-MB468 cell line, following 48h hypoxia (O<sub>2</sub> 1%).

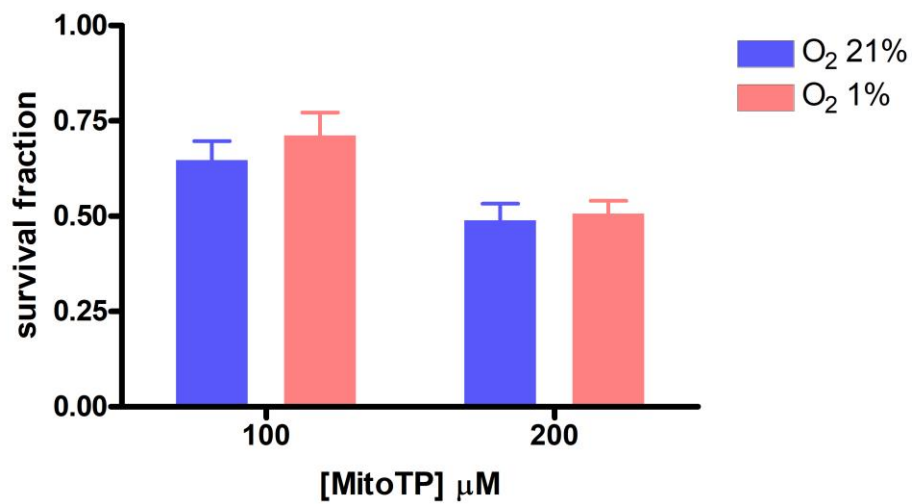

Figure S2 – Effects of MitoTP (100 and 200  $\mu\text{M}$ ) treatment and 48h incubation in normoxia ( $\text{O}_2$  21%) or hypoxia ( $\text{O}_2$  1%) on MDA-MB468 viability (mean $\pm$ S.E. of 3 independent experiments).

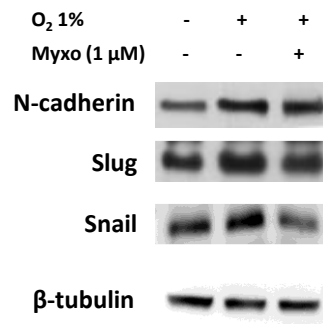

Figure S3: N-cadherin, Slug and Snail protein levels in MDA-MB468 cells, following 48h treatment with Myxo (1  $\mu$ M) and incubation in hypoxia (O<sub>2</sub> 1%).

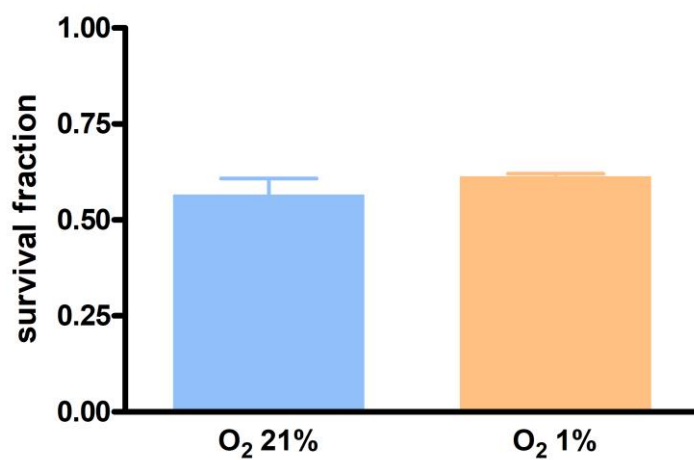

Figure S4 – Effects of Myxo (1  $\mu$ M) treatment and 48h incubation in normoxia (O<sub>2</sub> 21%) or hypoxia (O<sub>2</sub> 1%) on MDA-MB468 viability (mean $\pm$ S.E. of 3 independent experiments).

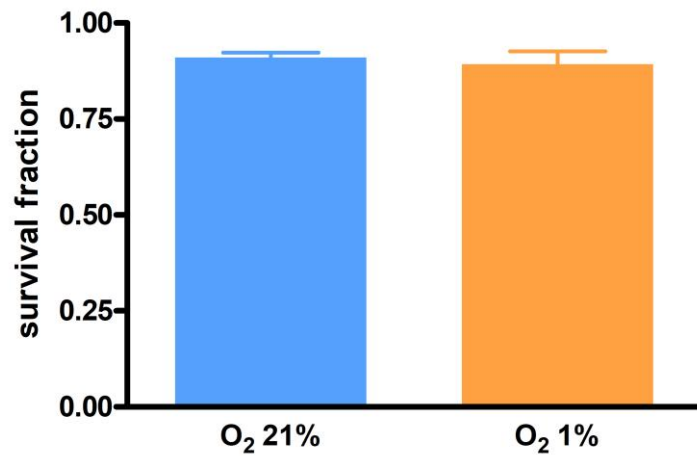

Figure S5 – Effects of Ter (25 $\mu$ M) treatment and 48h incubation in normoxia (O<sub>2</sub> 21%) or hypoxia (O<sub>2</sub> 1%) on MDA-MB468 viability (mean $\pm$ S.E. of 3 independent experiments).

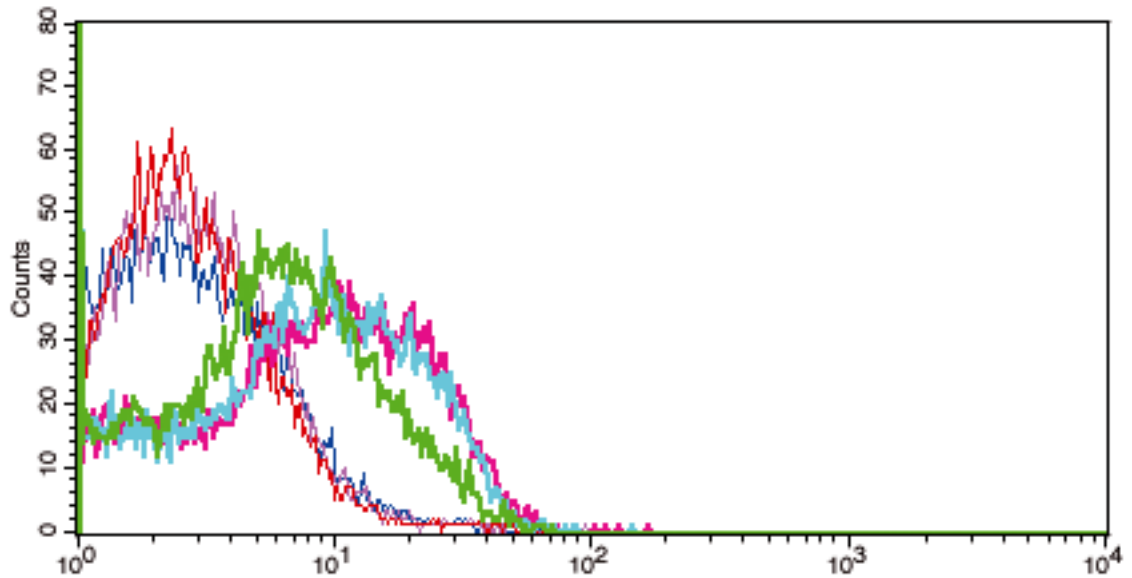

Figure S6: Effects of UQCRB silencing on ROS levels in MDA-MB468 cells, following 48h incubation in normoxia (O<sub>2</sub> 21%) or hypoxia (O<sub>2</sub> 1%). Blue line: MDA-MB468/pLVTHM O<sub>2</sub> 21%; red line: MDA-MB468/scrambledUQCRB O<sub>2</sub> 21%; purple line: MDA-MB468/shUQCRB O<sub>2</sub> 21%; light blue line: MDA-MB468/pLVTHM O<sub>2</sub> 1%; pink line: MDA-MB468/scrambledUQCRB O<sub>2</sub> 1%; green line: MDA-MB468/shUQCRB O<sub>2</sub> 1%.

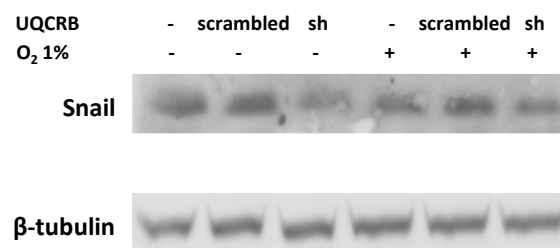

Figure S7: Snail protein levels in MDA-MB468/pLVTHM, MDA-MB468/scrambledUQCRB and MDA-MB468/shUQCRB cell lines, following 48h incubation in normoxia or hypoxia (O<sub>2</sub> 1%).

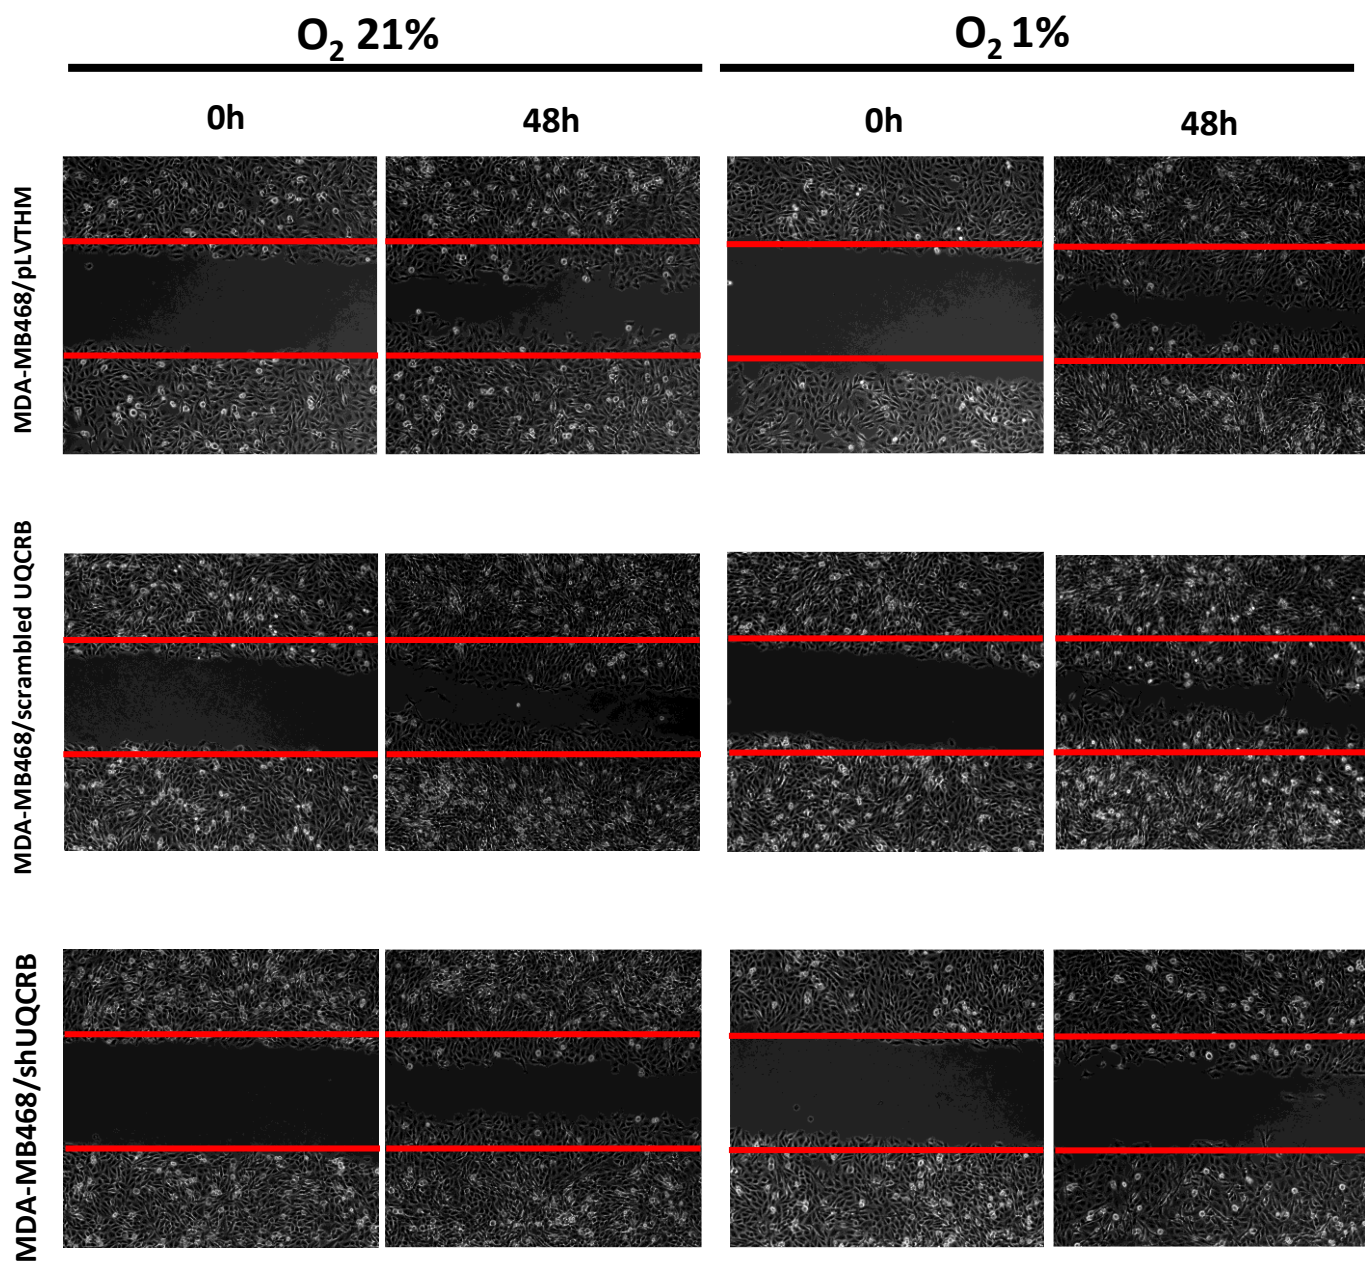

Figure S8: representative images of the Scratch Wound Healing assay performed in MDA-MB468/pLVTHM, MDA-MB468/scrambledUQCRB and MDA-MB468/shUQCRB cell lines, following 48h incubation in normoxia ( $O_2$  21%) or hypoxia ( $O_2$  1%).
